# Supplementary material
Source: PubMed Central journal article supplement (PMC7747039)
Supplement: jamaoncol-e206353-s001.pdf [file jamaoncol-e206353-s001.pdf]

## Supplementary Online Content

Van Poznak CH, Unger JM, Darke AK, et al. Association of osteonecrosis of the jaw with zoledronic acid treatment for bone metastases in patients with cancer. *JAMA Oncol*. Published online December 17, 2020. doi:10.1001/jamaoncol.2020.6353

**eFigure 1.** Geographic Distribution of US Enrollments to S0702

**eFigure 2.** Hazard Risk of Confirmed Osteonecrosis of the Jaw (ONJ) by Baseline Factors

**eFigure 3.** Hazard Risk of Confirmed Plus Suspected ONJ by Baseline Predictors

**eTable 1.** Patient Characteristics by Baseline Dental Examination Status

**eTable 2.** Cumulative Incidence of ONJ

**eTable 3.** Description of Lesions

**eTable 4.** Patient-Reported Outcomes of Oral Health–Related Quality of Life

This supplementary material has been provided by the authors to give readers additional information about their work.

**eFigure 1.** Geographic Distribution of US Enrollments to S0702

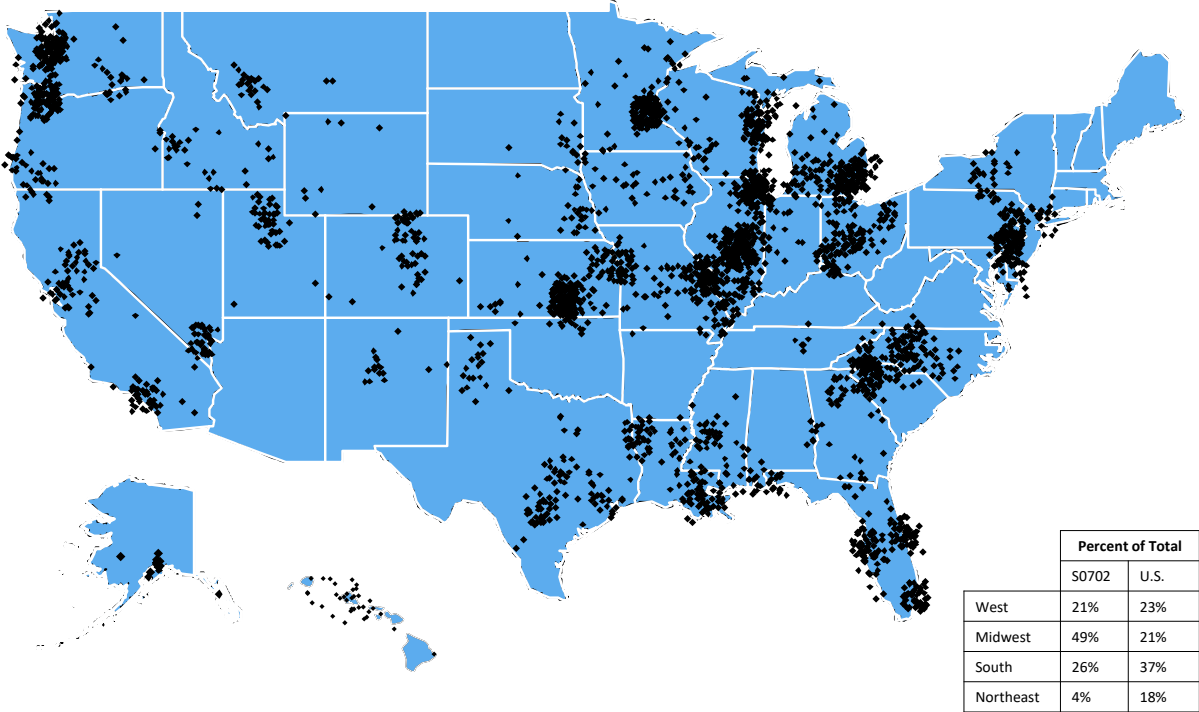

**eFigure 2.** Hazard Risk of Confirmed Osteonecrosis of the Jaw (ONJ) by Baseline Factors

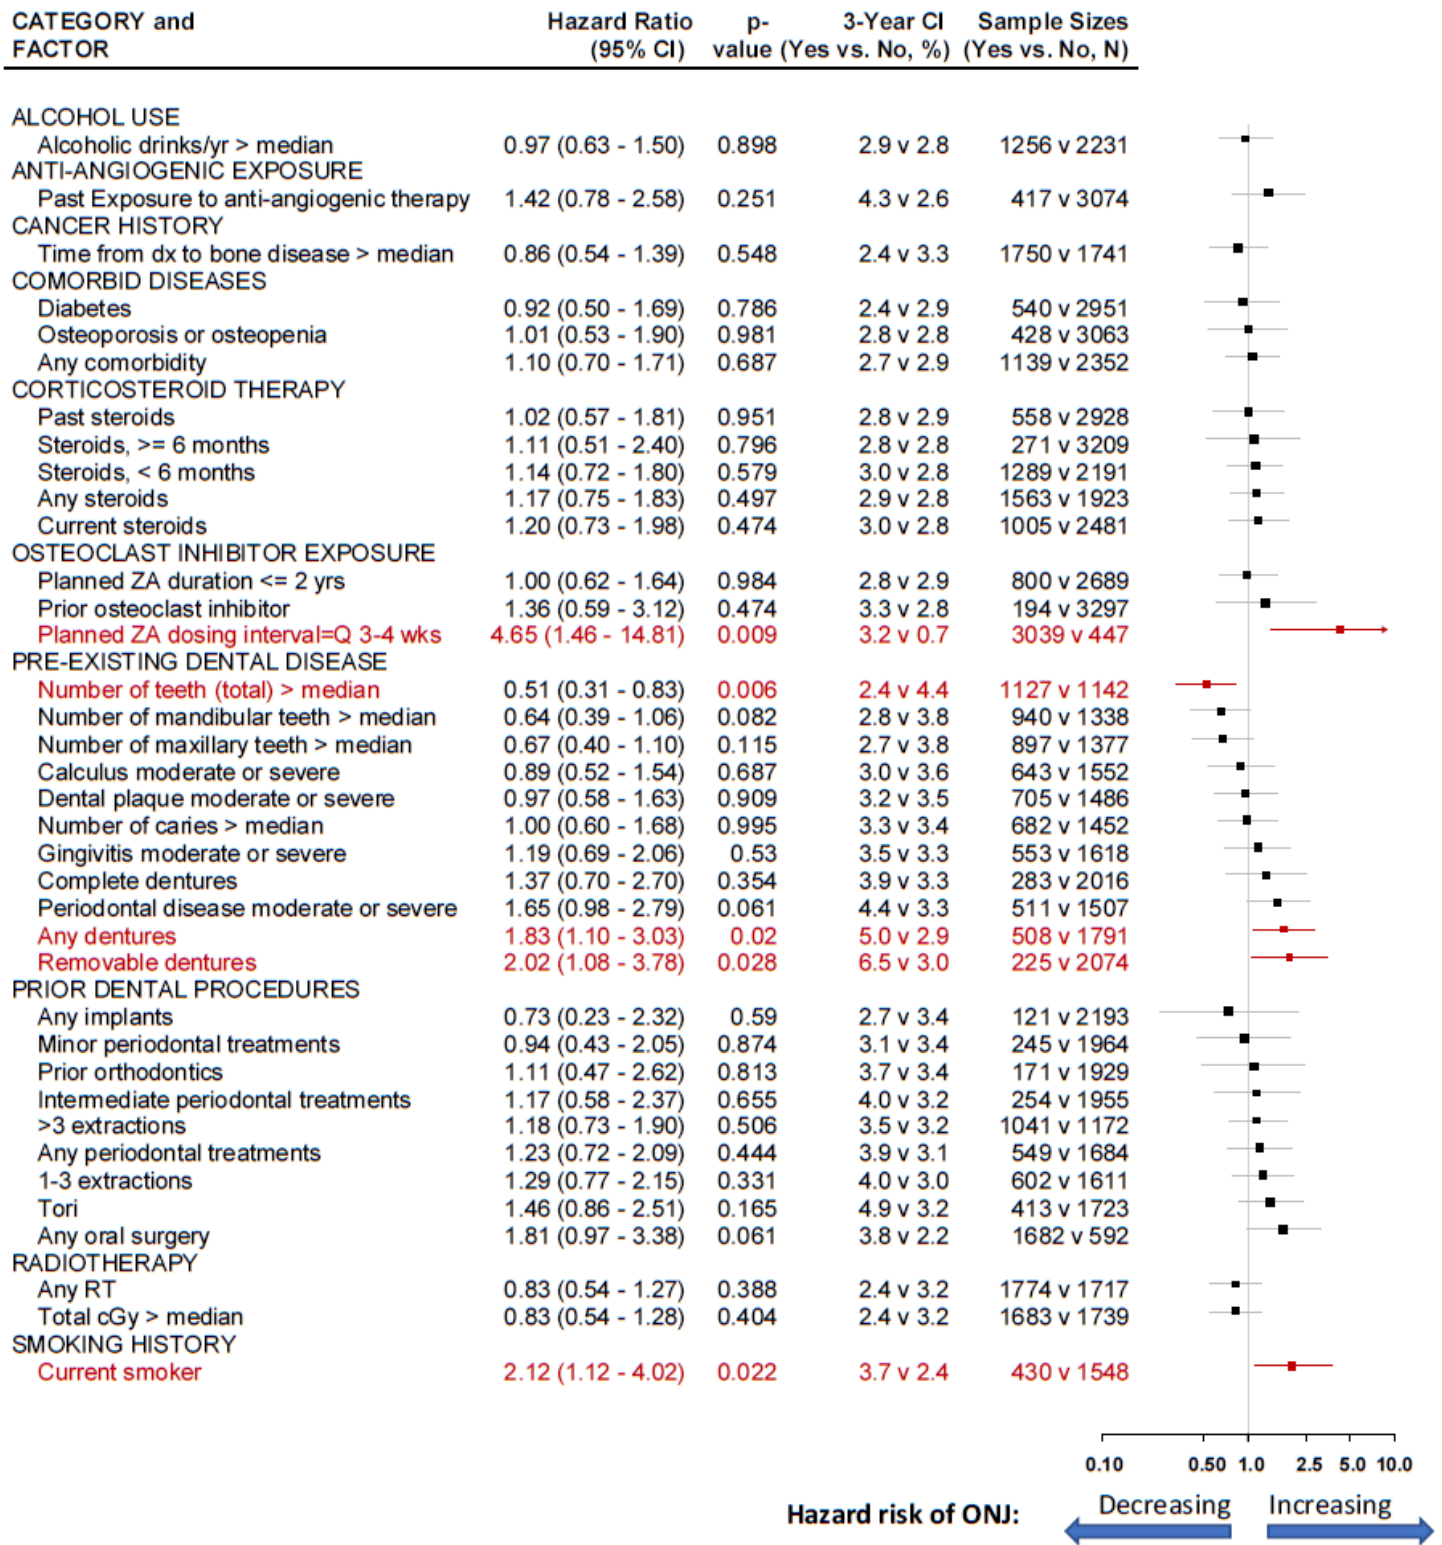

The boxes show the hazard ratio (HR) and the horizontal lines represents the 95% CIs. The vertical line is the line of equal hazard. ZA indicates zoledronic acid.

**eFigure 3. Hazard Risk of Confirmed Plus Suspected ONJ by Baseline Predictors**

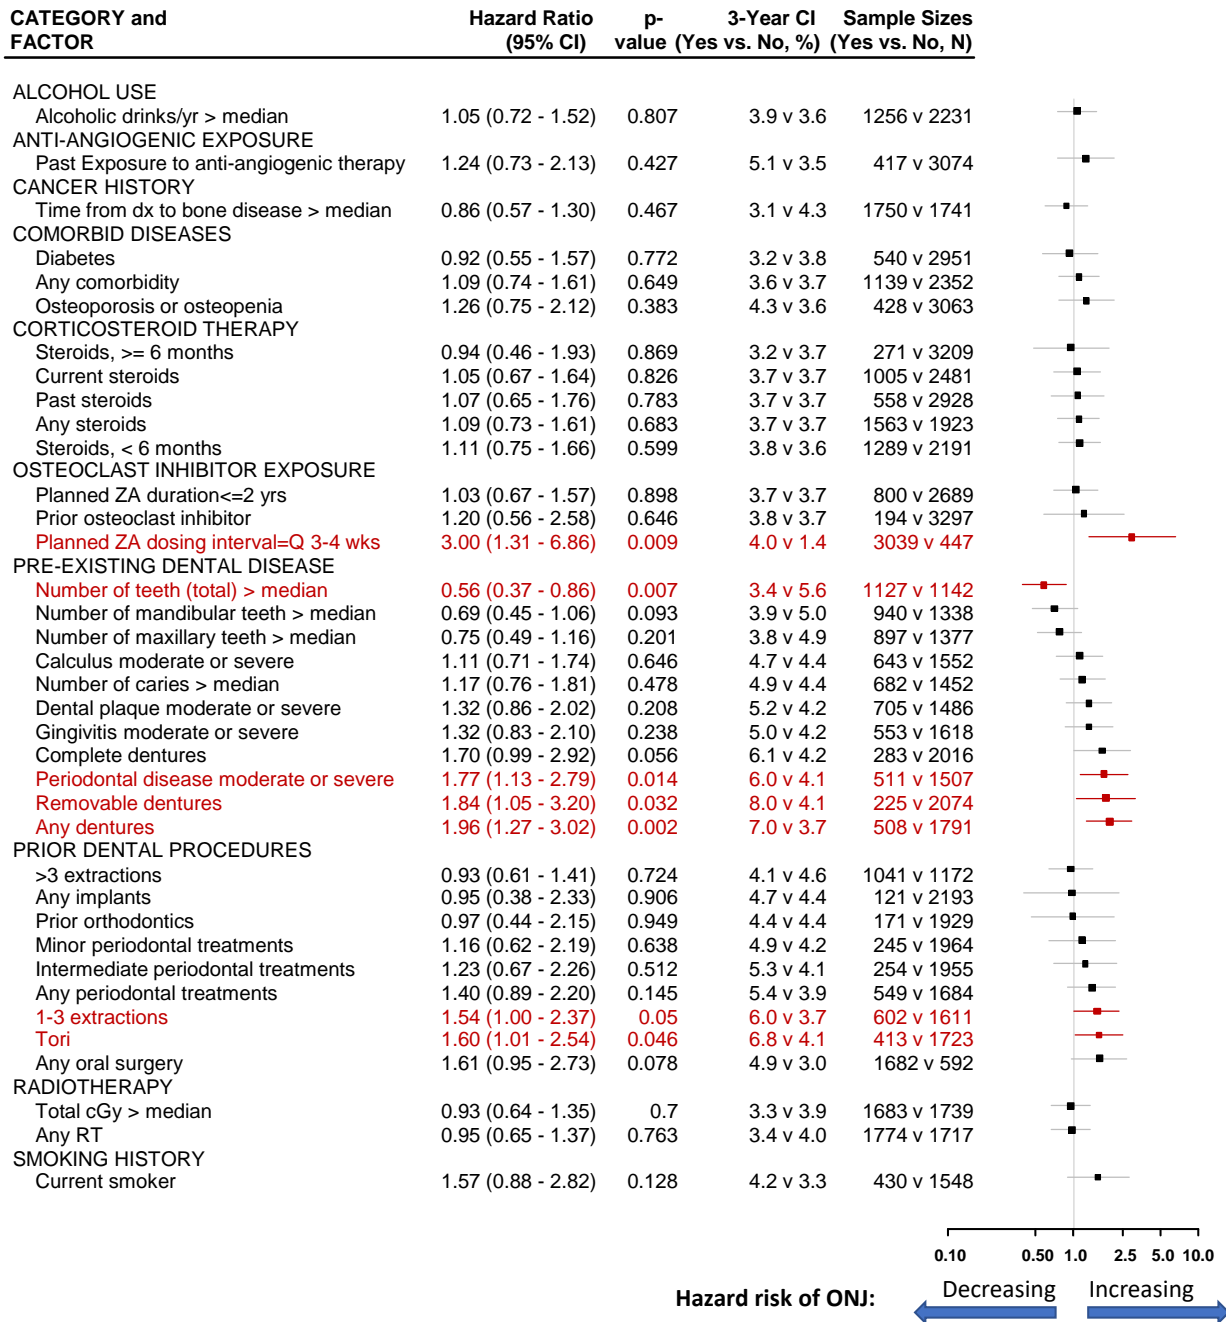

**eTable 1. Patient Characteristics by Baseline Dental Examination Status**

|                                                                                  | All eligible patients<br>(n=3,491) |       | Exam done<br>(n=2,263) |       | No exam done<br>(n=1,228) |       | Exam vs<br>No exam<br>p <sup>a</sup> |
|----------------------------------------------------------------------------------|------------------------------------|-------|------------------------|-------|---------------------------|-------|--------------------------------------|
|                                                                                  | n                                  | %     | n                      | %     | n                         | %     |                                      |
| Age, y (mean, sd)                                                                | 63.1 (11.6)                        |       | 63.3 (11.5)            |       | 62.6 (11.6)               |       | 0.074                                |
| Age, y (groups)                                                                  |                                    |       |                        |       |                           |       |                                      |
| <55                                                                              | 763                                | 21.9% | 469                    | 20.7% | 294                       | 23.9% | 0.154                                |
| 55-59                                                                            | 538                                | 15.4% | 353                    | 15.6% | 185                       | 15.1% |                                      |
| 60-64                                                                            | 584                                | 16.7% | 371                    | 16.4% | 213                       | 17.3% |                                      |
| 65-69                                                                            | 587                                | 16.8% | 402                    | 17.8% | 185                       | 15.1% |                                      |
| 70-74                                                                            | 358                                | 10.3% | 234                    | 10.3% | 124                       | 10.1% |                                      |
| >=75                                                                             | 661                                | 18.9% | 434                    | 19.2% | 227                       | 18.5% |                                      |
| Gender                                                                           |                                    |       |                        |       |                           |       |                                      |
| Female                                                                           | 1,806                              | 51.7% | 1,187                  | 52.5% | 619                       | 50.4% | 0.248                                |
| Male                                                                             | 1,685                              | 48.3% | 1,076                  | 47.5% | 609                       | 49.6% |                                      |
| Race                                                                             |                                    |       |                        |       |                           |       |                                      |
| White                                                                            | 2,942                              | 84.3% | 1,939                  | 85.7% | 1,003                     | 81.7% | <.001                                |
| Black                                                                            | 368                                | 10.5% | 181                    | 8.0%  | 187                       | 15.2% |                                      |
| Asian                                                                            | 55                                 | 1.6%  | 43                     | 1.9%  | 12                        | 1.0%  |                                      |
| Pacific Islander                                                                 | 5                                  | 0.1%  | 4                      | 0.2%  | 1                         | 0.1%  |                                      |
| Native                                                                           | 18                                 | 0.5%  | 12                     | 0.5%  | 6                         | 0.5%  |                                      |
| Multiracial                                                                      | 9                                  | 0.3%  | 5                      | 0.2%  | 4                         | 0.3%  |                                      |
| Unknown race                                                                     | 94                                 | 2.7%  | 79                     | 3.5%  | 15                        | 1.2%  |                                      |
| Hispanic/Latino                                                                  |                                    |       |                        |       |                           |       |                                      |
| Yes                                                                              | 190                                | 5.4%  | 131                    | 5.8%  | 59                        | 4.8%  | 0.210                                |
| No                                                                               | 3,184                              | 91.2% | 2,053                  | 90.7% | 1,131                     | 92.1% |                                      |
| Missing/Unknown                                                                  | 117                                | 3.4%  | 79                     | 3.5%  | 38                        | 3.1%  |                                      |
| Zubrod performance status                                                        |                                    |       |                        |       |                           |       |                                      |
| 0                                                                                | 1,343                              | 38.5% | 924                    | 40.8% | 419                       | 34.1% | <.001                                |
| 1                                                                                | 1,719                              | 49.2% | 1,117                  | 49.4% | 602                       | 49.0% |                                      |
| 2                                                                                | 351                                | 10.1% | 176                    | 7.8%  | 175                       | 14.3% |                                      |
| 3                                                                                | 78                                 | 2.2%  | 46                     | 2.0%  | 32                        | 2.6%  |                                      |
| Alcohol use within past 3 months                                                 |                                    |       |                        |       |                           |       |                                      |
| None                                                                             | 2,231                              | 63.9% | 1,365                  | 60.3% | 866                       | 70.5% | <.001                                |
| 1 per wk or fewer                                                                | 542                                | 15.5% | 369                    | 16.3% | 173                       | 14.1% |                                      |
| 2-6 per wk                                                                       | 301                                | 8.6%  | 221                    | 9.8%  | 80                        | 6.5%  |                                      |
| 1-3 per dy                                                                       | 204                                | 5.8%  | 151                    | 6.7%  | 53                        | 4.3%  |                                      |
| 4 or more per dy                                                                 | 28                                 | 0.8%  | 18                     | 0.8%  | 10                        | 0.8%  |                                      |
| Missing/Unknown                                                                  | 185                                | 5.3%  | 139                    | 6.1%  | 46                        | 3.7%  |                                      |
| Cigarette smoking                                                                |                                    |       |                        |       |                           |       |                                      |
| Nonsmoker                                                                        | 1,545                              | 44.3% | 1,071                  | 47.3% | 474                       | 38.6% | <.001                                |
| Former smoker                                                                    | 1,513                              | 43.3% | 980                    | 43.3% | 533                       | 43.4% |                                      |
| Current smoker                                                                   | 430                                | 12.3% | 209                    | 9.2%  | 221                       | 18.0% |                                      |
| Missing/Unknown                                                                  | 3                                  | 0.1%  | 3                      | 0.1%  | 0                         | 0.0%  |                                      |
| Patient reported dental pain/discomfort in last 3 months (mean, sd) <sup>b</sup> |                                    |       |                        |       |                           |       |                                      |
| Average pain                                                                     | 0.81 (1.84)                        |       | 0.78 (1.78)            |       | 0.86 (1.96)               |       | 0.230                                |
| Interference with eating                                                         | 0.50 (1.55)                        |       | 0.49 (1.54)            |       | 0.53 (1.57)               |       | 0.376                                |
| Interference with smile                                                          | 0.32 (1.36)                        |       | 0.30 (1.33)            |       | 0.36 (1.42)               |       | 0.265                                |
| Interference with speech                                                         | 0.23 (1.07)                        |       | 0.24 (1.09)            |       | 0.23 (1.02)               |       | 0.724                                |
| Interference with quality of life                                                | 0.35 (1.28)                        |       | 0.34 (1.29)            |       | 0.37 (1.28)               |       | 0.527                                |

<sup>a</sup>P-values for categorical variables are from a chi-squared test (missing/unknown excluded); P-values for linear variables are from a t-test.

<sup>b</sup>Patient-reported outcomes are based on the brief pain inventory and are rated from 0 (No pain/Has not interfered) to 10 (Pain as bad as you can imagine/Completely interfered).

**eTable 2.** Cumulative Incidence of ONJ

| Cancer type                         | Point estimate (95% CI) by study year |               |               |
|-------------------------------------|---------------------------------------|---------------|---------------|
|                                     | 1                                     | 2             | 3             |
| <b>Confirmed ONJ</b>                |                                       |               |               |
| All                                 | 0.8 (0.5-1.1)                         | 2.0 (1.5-2.5) | 2.8 (2.3-3.5) |
| Breast                              | 0.3 (0.1-0.8)                         | 1.4 (0.8-2.3) | 2.4 (1.5-3.4) |
| Lung                                | 0.9 (0.4-1.9)                         | 2.2 (1.3-3.6) | 2.7 (1.6-4.2) |
| Myeloma                             | 0.9 (0.3-1.9)                         | 2.9 (1.7-4.5) | 4.3 (2.8-6.4) |
| Prostate                            | 1.2 (0.6-2.2)                         | 1.9 (1.1-3.2) | 2.9 (1.7-4.5) |
| <b>Confirmed plus suspected ONJ</b> |                                       |               |               |
| All                                 | 1.1 (0.8-1.5)                         | 2.6 (2.1-3.2) | 3.7 (3.1-4.4) |
| Breast                              | 0.5 (0.2-1.1)                         | 1.7 (1.0-2.6) | 2.9 (2.0-4.1) |
| Lung                                | 1.4 (0.7-2.5)                         | 2.8 (1.7-4.3) | 3.5 (2.2-5.1) |
| Myeloma                             | 1.0 (0.4-2.2)                         | 3.6 (2.3-5.4) | 5.3 (3.6-7.5) |
| Prostate                            | 1.3 (0.6-2.4)                         | 2.5 (1.5-3.9) | 3.8 (2.5-5.5) |

Abbreviation: ONJ, osteonecrosis of the jaw.

**eTable 3.** Description of Lesions<sup>1</sup>

| Description of Lesions                    |          |         |          |         |          |         |
|-------------------------------------------|----------|---------|----------|---------|----------|---------|
| Factors                                   | Lesion 1 |         | Lesion 2 |         | Lesion 3 |         |
|                                           | N        | %/(IQR) | N        | %/(IQR) | N        | %/(IQR) |
| Type                                      |          |         |          |         |          |         |
| Follow-up                                 | 36       | 45.6%   | 6        | 50.0%   | 1        | 100.0%  |
| New                                       | 43       | 54.4%   | 6        | 50.0%   |          |         |
| Symptom severity                          |          |         |          |         |          |         |
| Asymptomatic                              | 33       | 45.2%   | 4        | 36.4%   |          |         |
| Mild                                      | 26       | 35.6%   | 3        | 27.3%   |          |         |
| Moderate                                  | 11       | 15.1%   | 4        | 36.4%   | 1        | 100.0%  |
| Severe                                    | 3        | 4.1%    | 0        | 0%      |          |         |
| Lesion-associated periodontal infection   |          |         |          |         |          |         |
| No                                        | 59       | 84.3%   | 9        | 81.8%   |          |         |
| Yes                                       | 11       | 15.7%   | 2        | 18.2%   | 1        | 100.0%  |
| Lesion-associated dental extraction       |          |         |          |         |          |         |
| No                                        | 41       | 58.6%   | 7        | 63.6%   | 1        | 100.0%  |
| Yes                                       | 29       | 41.4%   | 4        | 36.4%   |          |         |
| Lesion-associated denture trauma          |          |         |          |         |          |         |
| No                                        | 63       | 90.0%   | 8        | 72.7%   |          |         |
| Yes                                       | 7        | 10.0%   | 3        | 27.3%   | 1        | 100.0%  |
| Lesion-associated other dental surgery    |          |         |          |         |          |         |
| No                                        | 67       | 95.7%   | 11       | 100.0%  | 1        | 100.0%  |
| Yes                                       | 3        | 4.3%    |          |         |          |         |
| Lesion-associated trauma (other)          |          |         |          |         |          |         |
| No                                        | 66       | 94.3%   | 11       | 100.0%  | 1        | 100.0%  |
| Yes                                       | 4        | 5.7%    |          |         |          |         |
| Any associated factors above <sup>2</sup> |          |         |          |         |          |         |
| No                                        | 28       | 40.0%   | 4        | 36.4%   |          |         |
| Yes                                       | 42       | 60.0%   | 7        | 63.6%   | 1        | 100.0%  |

IQR = intra quartile range

<sup>1</sup> Percentages shown among those with known data.

<sup>2</sup> Associated factors are periodontal infection, dental extraction, denture trauma, other dental surgery, or other trauma that were indicated by the patient's dentist as associated with the lesion (the factors are also individually listed).

**eTable 4.** Patient-Reported Outcomes of Oral Health–Related Quality of Life<sup>1</sup>

| PRO Item <sup>3</sup>                    | Patient reported dental pain/discomfort using items adapted from the Brief Pain Inventory (mean/sd) |                                   |                                           |                        |                    |                                        |                                                       |
|------------------------------------------|-----------------------------------------------------------------------------------------------------|-----------------------------------|-------------------------------------------|------------------------|--------------------|----------------------------------------|-------------------------------------------------------|
|                                          | Baseline                                                                                            |                                   |                                           | Follow-up <sup>2</sup> |                    | P-value                                |                                                       |
|                                          | All patients (N=1703)                                                                               | Patients who developed ONJ (N=83) | Patients who did not develop ONJ (N=1620) | ONJ cases (N=83)       | Non-cases (N=1620) | Comparing baseline values <sup>4</sup> | Comparing follow-up score minus baseline <sup>5</sup> |
| <b>Average pain</b>                      | 0.71 (1.69)                                                                                         | 0.60 (1.67)                       | 0.71 (1.69)                               | 2.72 (3.40)            | 0.64 (1.69)        | .57                                    | <.001                                                 |
| <b>Interference with eating</b>          | 0.39 (1.32)                                                                                         | 0.54 (1.64)                       | 0.38 (1.30)                               | 2.80 (3.58)            | 0.45 (1.30)        | .40                                    | <.001                                                 |
| <b>Interference with smile</b>           | 0.23 (1.13)                                                                                         | 0.28 (1.23)                       | 0.23 (1.12)                               | 1.32 (2.84)            | 0.31 (1.12)        | .71                                    | .004                                                  |
| <b>Interference with speech</b>          | 0.17 (0.85)                                                                                         | 0.20 (0.80)                       | 0.16 (0.85)                               | 1.15 (2.60)            | 0.22 (1.08)        | .73                                    | .001                                                  |
| <b>Interference with quality of life</b> | 0.23 (0.93)                                                                                         | 0.36 (1.30)                       | 0.22 (0.91)                               | 2.22 (3.34)            | 0.34 (1.33)        | .38                                    | <.001                                                 |

<sup>1</sup> Compared the change in PRO scores for each item between baseline and FU. Only patients with both baseline and follow-up PRO scores included.

<sup>2</sup> For patients with ONJ, the follow-up PRO score was assessed at the time of initial diagnosis. For patients without ONJ (non-cases), the follow-up PRO score closest to the median diagnosis time of 521 days for ONJ cases was used.

<sup>3</sup> Scale of 0-10; 0 is no symptom, 10 is maximum symptom

<sup>4</sup> T-tests comparing baseline values between cases and noncases.

<sup>5</sup> Paired T-tests comparing the difference between cases and non-cases in the change between baseline and follow-up scores.
